# Supplementary material for: Bent and twisted: the electronic structure of 2-azapropenylium ions obtained by guanidine oxidation
Source: Royal Society of Chemistry journal article supplement (doi:10.1039/c6ra04494h), 2016-01-01
Supplement: c6ra04494h1.pdf [file c6ra04494h1.pdf]

## Supporting Information

### **Bent and twisted: the electronic structure of 2-azapropenylium ions obtained by guanidine oxidation**

Julius Hornung, Olaf Hübner, Elisabeth Kaifer, Hans-Jörg Himmel\*

#### **Content**

- NMR spectra for **1** and **1**(PF<sub>6</sub>)<sub>2</sub>
- Comparison between the electron donor capacity of **1** and **2** with related compounds
- Comparison between exp. determined and calculated structure of **1**<sup>2+</sup>
- UV/Vis spectrum and TD-DFT calculations for **1**<sup>2+</sup>
- Results of the population analysis for **1**<sup>2+</sup>
- Isosurfaces of selected orbitals of **2**<sup>2+</sup>
- Results of the calculations (B3LYP/def2-TZVP) with restrictions imposed by symmetry

$^1\text{H}$  NMR of **1** (399.89 MHz,  $\text{CDCl}_3$ , 295.8 K)

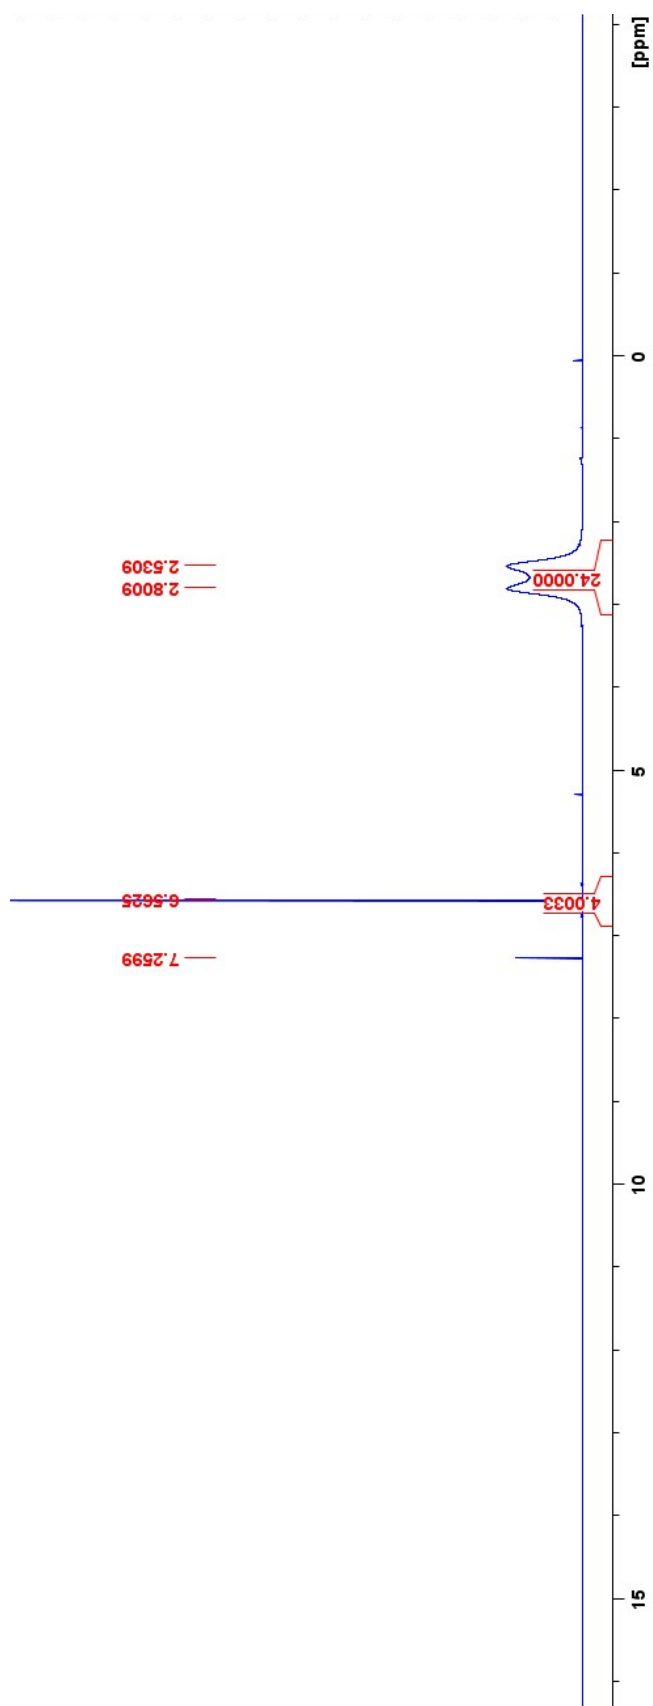

$^{13}\text{C}$  NMR of **1** (100.55 MHz,  $\text{CDCl}_3$ , 297.5 K)

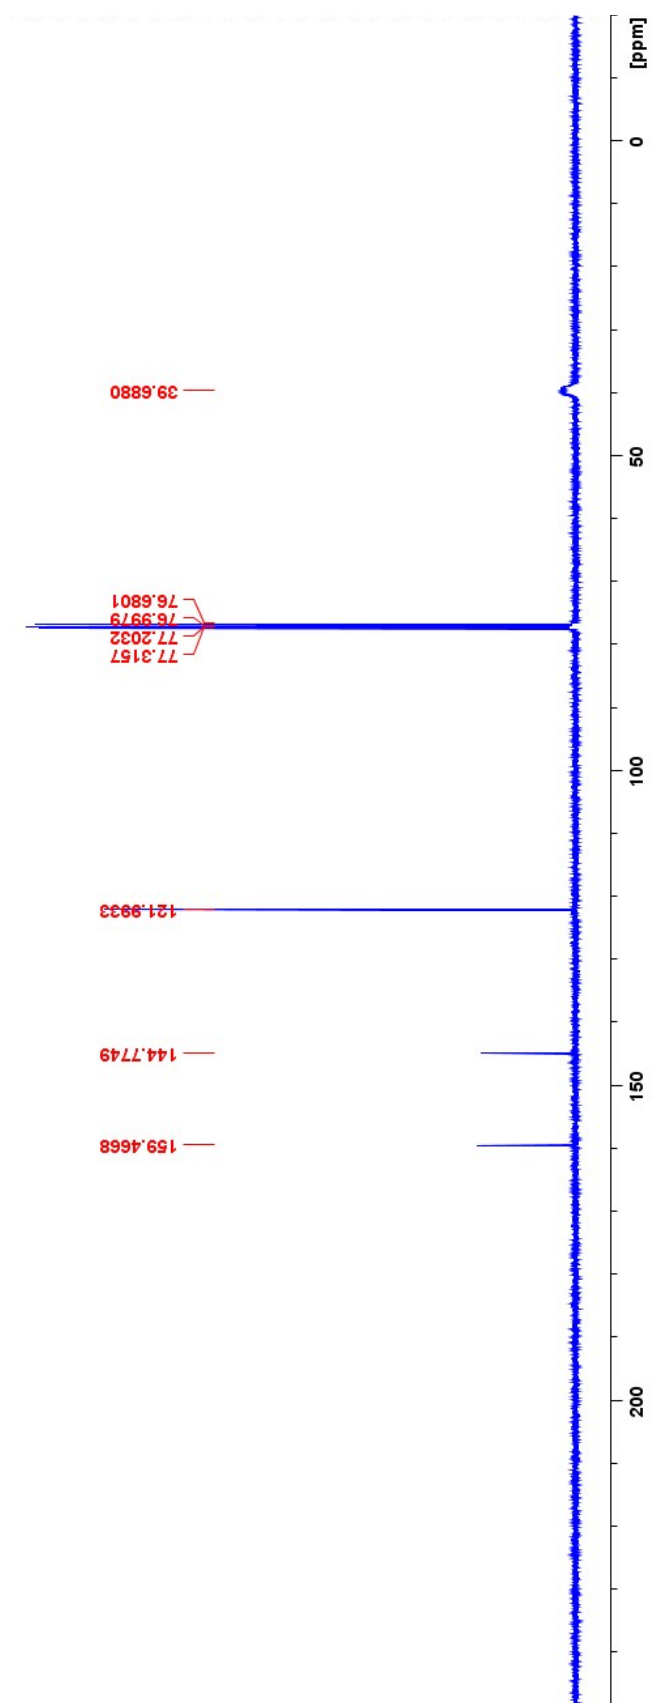

$^1\text{H}$  NMR of  $\mathbf{1}(\text{PF}_6)_2$  (399.89 MHz,  $\text{CD}_3\text{CN}$ , 296.5 K)

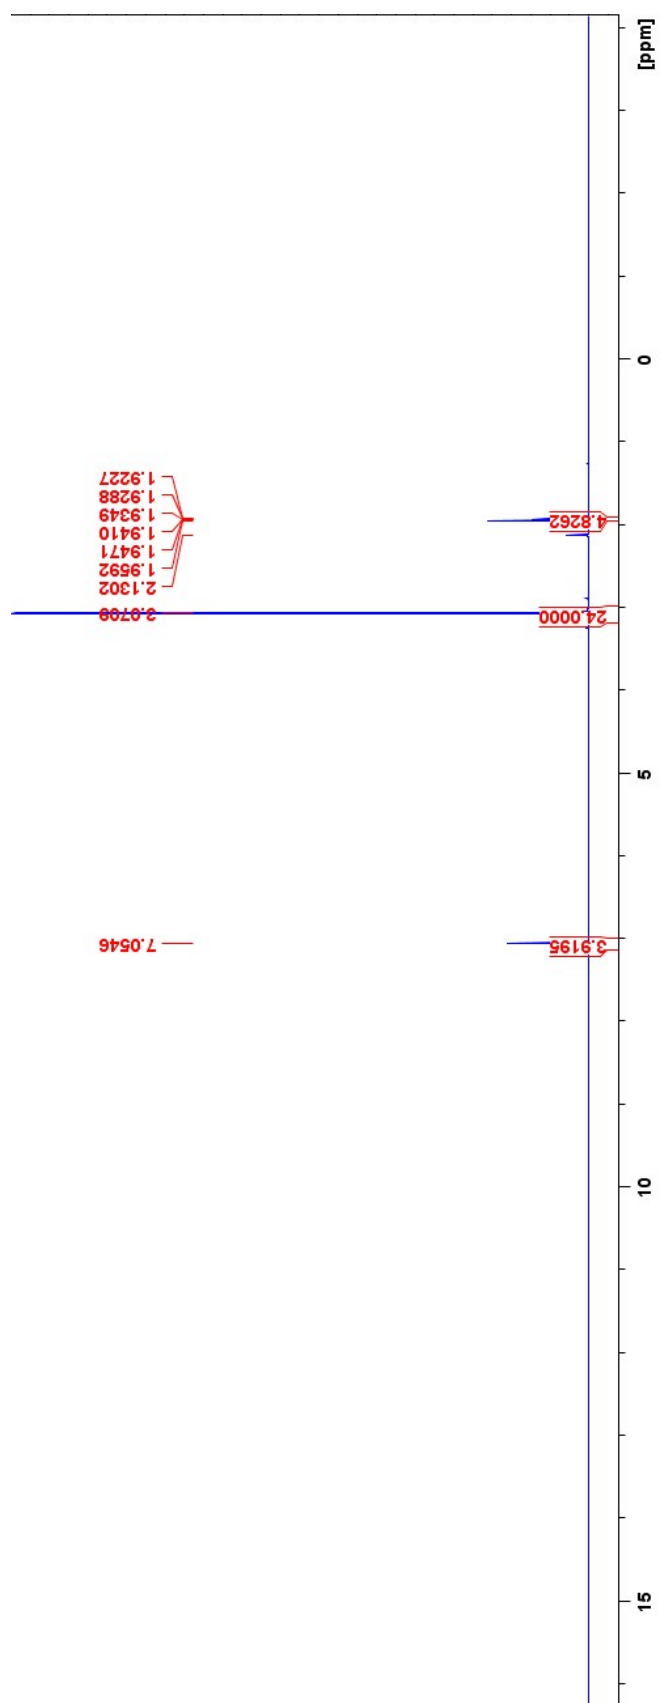

$^{13}\text{C}$  NMR of  $\mathbf{1}(\text{PF}_6)_2$  (100.55 MHz,  $\text{CD}_3\text{CN}$ , 298.0 K)

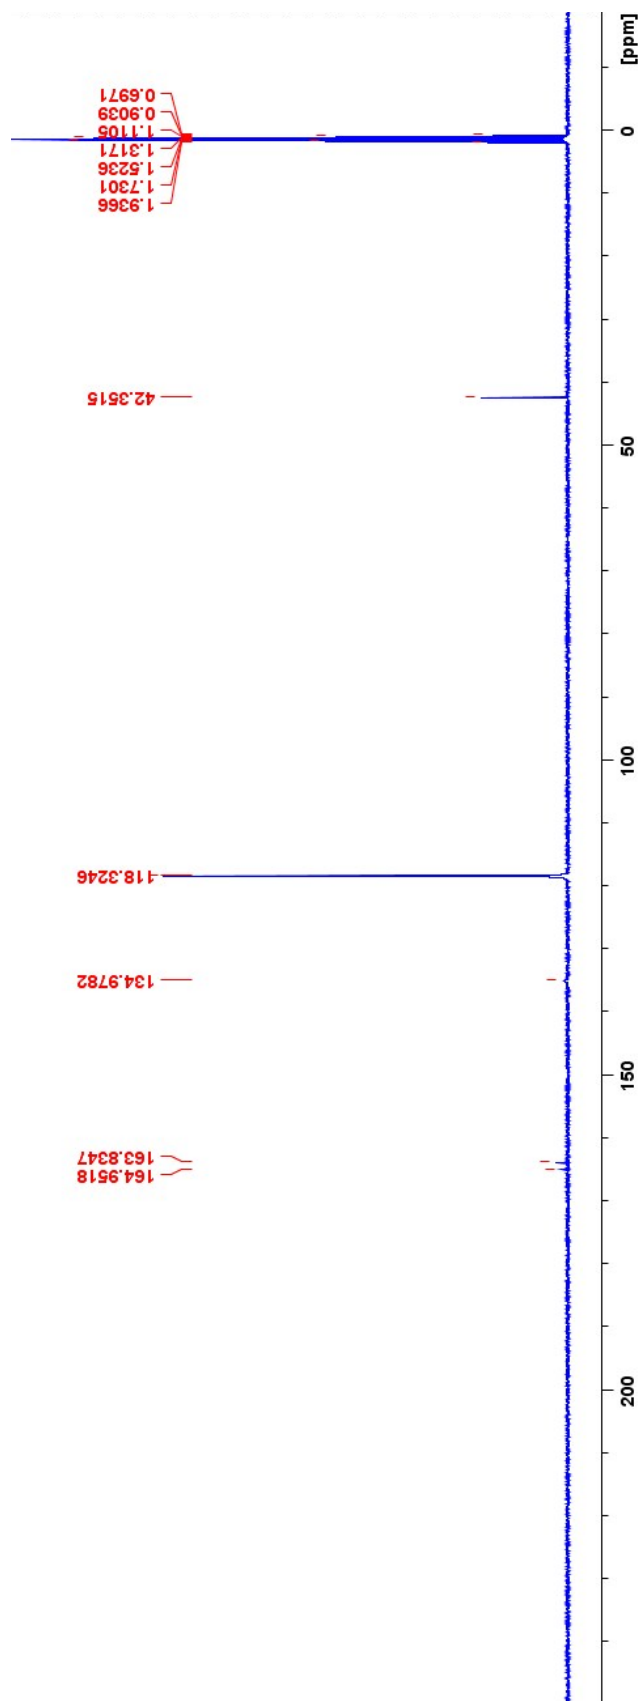

## Comparison of **1** with GFA compounds and bisguanidines

Table S1 compares the redox potential of **1** with GFA compounds. The redox potential of **1** is significantly higher than that of **3** ( $E_{1/2} = -0.73$  V vs. Fc/Fc<sup>+</sup> in CH<sub>3</sub>CN). As expected, the electron donor capacity increases with the number of guanidino groups attached to the aromatic system.

**Table S1.** Redox potentials obtained from CV measurements (<sup>n</sup>Bu<sub>4</sub>NPF<sub>6</sub> as supporting electrolyte, scan speed 100 mV·s<sup>-1</sup>, CH<sub>3</sub>CN solution for **1**, **3** and **4**, CH<sub>2</sub>Cl<sub>2</sub> solution for **5**).

| Compound | $E_{1/2}$ / V vs. Fc/Fc <sup>+</sup> |                            |
|----------|--------------------------------------|----------------------------|
|          | 1 <sup>st</sup> redox step           | 2 <sup>nd</sup> redox step |
| <b>1</b> | -0.22                                | -0.22                      |
| <b>3</b> | -0.73                                | -0.73                      |
| <b>4</b> | -0.65                                | -0.65                      |
| <b>5</b> | -0.76                                | -0.76                      |

In Table S2, the calculated (B3LYP/def2-TZVP) adiabatic first and second ionization energies for several compounds are compared. Solvation effects, which were shown to be very substantial,<sup>[16]</sup> were considered with COSMO (COnductor-like Screening MOdel). According to these calculations, the  $I_1$  value for **1** is smaller than that of 1,4-bis(dimethylamino)benzene in the gas-phase (5.36 vs. 5.80 eV), but quite similar in polar solvents such as CH<sub>3</sub>CN (4.21 vs. 4.16 eV), in line with the experimentally determined  $E_{1/2}$  values. Compound **1**, on the other hand, is a much better two-electron donor. Its  $I_2$  value in the gas-phase is 1.80 eV lower than that of 1,4-bis(dimethylamino)benzene. In polar solvents, the  $I_2$  value of **1** is predicted to be only 0.54 eV higher than the  $I_1$  value. By contrast, for 1,4-bis(dimethylamino)benzene the  $I_2$  value is still 1.19 eV higher than the  $I_1$  value. Therefore it is not surprising that the CV measurements show clearly separated one-electron redox events in the case of 1,4-bis(dimethylamino)benzene, but not for **1**.

**Table S2.** Comparison between the first ( $I_1$ ) and second ( $I_2$ ) ionization energy calculated on the B3LYP/def2-TZVP level. The solvent effects were studied with the COSMO module ( $\epsilon(\text{THF}) = 7.6$ ,  $\epsilon(\text{CH}_3\text{CN}) = 37.5$ ).  $\epsilon = 1$  if not stated otherwise.

| compound                       | $I_1$ / eV | $I_2$ / eV |
|--------------------------------|------------|------------|
| <b>1</b>                       | 5.36       | 8.73       |
| <b>1</b> ( $\epsilon = 37.5$ ) | 4.21       | 4.75       |
| <b>1</b> ( $\epsilon = 7.6$ )  | 4.38       | 5.35       |
| <b>2</b>                       | 5.96       | 9.42       |
| <b>3</b>                       | 4.66       | 7.31       |
| <b>4</b> ( $\epsilon = 37.5$ ) | 3.68       | 4.00       |

Table S2 also includes the ionization energies for *p*-bisguanidino-benzene [**2**,  $(\text{C}_6\text{H}_4)(\text{NC}(\text{NH}_2)_2)_2$ ]. In the absence of the methyl groups, the ionization energies increase considerably. Hence the  $I_1$  and  $I_2$  values of **2** are by 0.60 respectively 0.69 eV higher than for **1**. The methyl groups also have a significant influence on the redox potentials of diamino-benzene. For *p*-diamino-benzene ( $\text{C}_6\text{H}_4(\text{NH}_2)_2$ ), a redox potential for the first redox process of  $E_{1/2} = -0.12$  V vs. Fc/Fc<sup>+</sup> was measured in CH<sub>3</sub>CN solution.<sup>[1]</sup>

[1] J. R. Quinn, F. W. Foss Jr., L. Venkataraman, R. Breslow, *J. Am. Chem. Soc.*, 2007, **129**, 12376 – 12377.

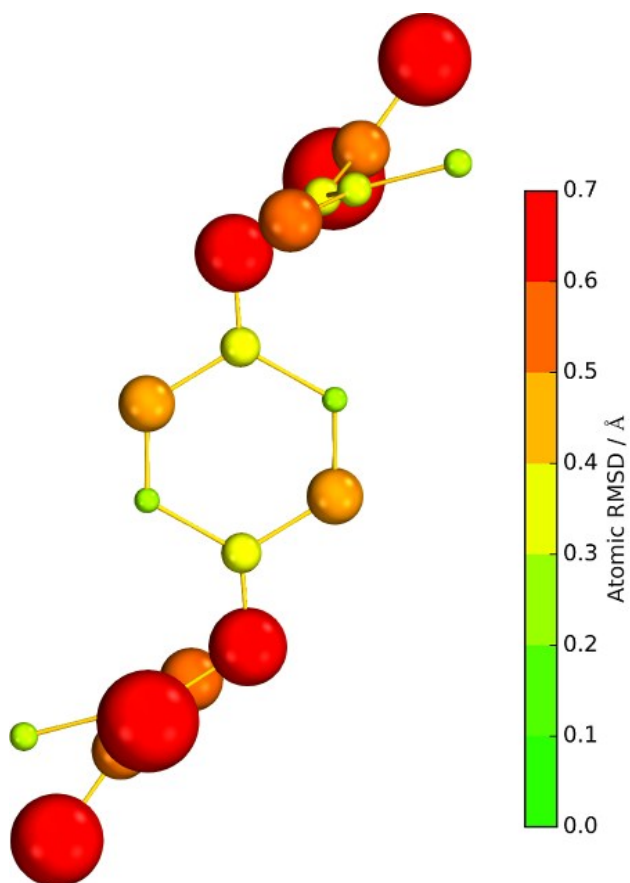

**Figure S1.** aRMSD plot comparing the calculated structure of  $1^{2+}$  with the experimental determined solid state structure. The size of the respective atom and color represents the deviation (in Å) between the two structures.



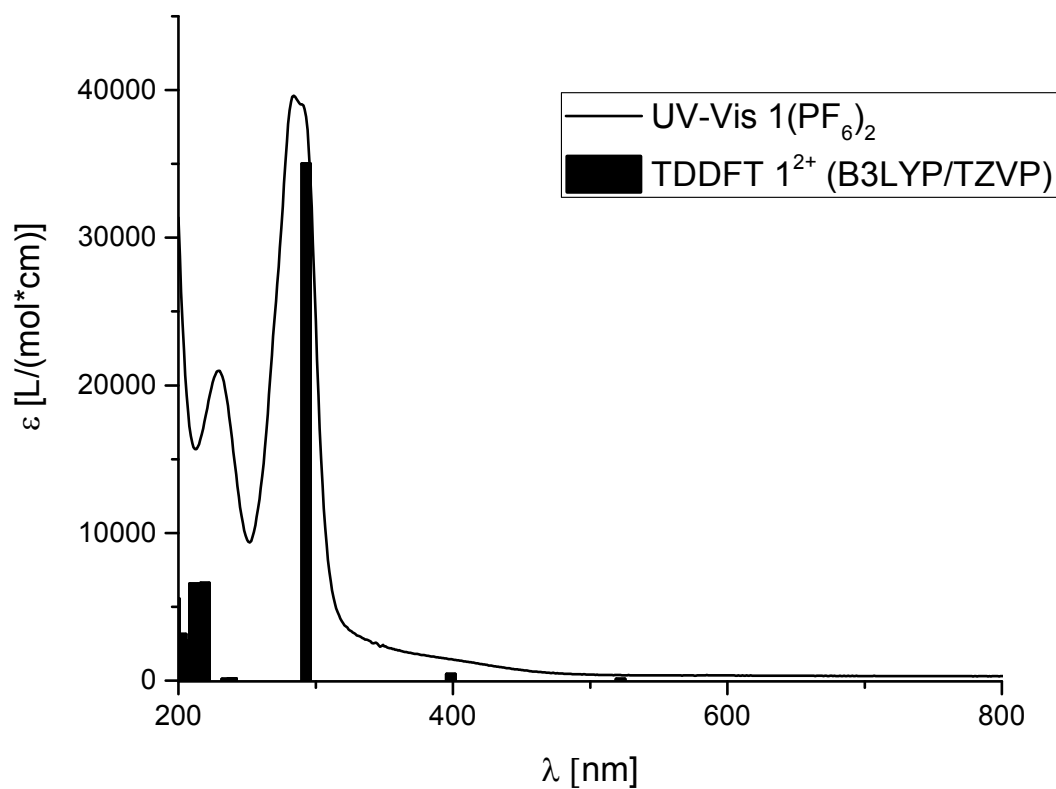

**Figure S2:** UV/Vis spectrum for  $1(\text{PF}_6)_2$  in  $\text{CH}_3\text{CN}$  and TD-DFT electronic transitions as calculated with B3LYP/def2-TZVP.

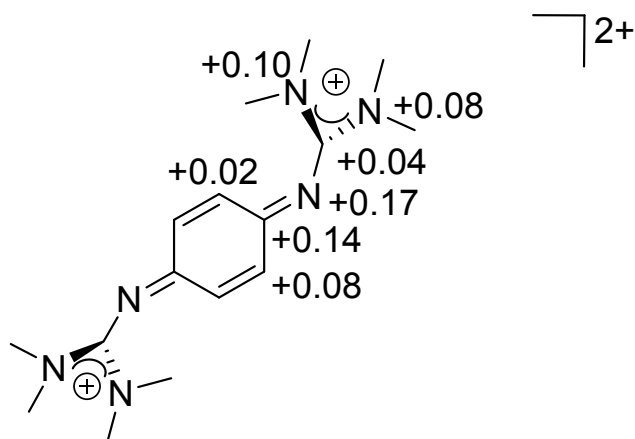

**Figure S3.** Results of a natural population analysis (NPA) for  $1^{2+}$ . The numbers indicate changes of elementary charges (in e) upon oxidation of neutral **1**.

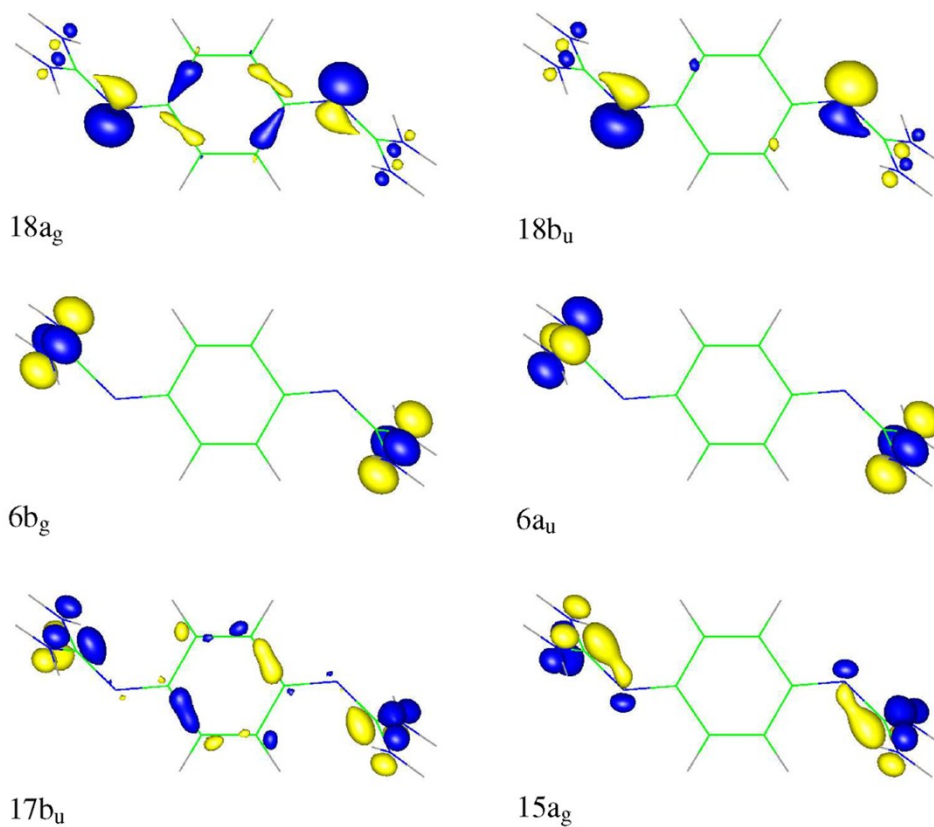

**Figure S4.** Isosurfaces ( $\pm 0.09$ ) of selected orbitals of  $2^{2+}$  by density functional calculations with the B3LYP functional and the def2-TZVP basis set. The orbitals 18  $a_g$  and 18  $b_u$  (HOMO-2 and HOMO-3) are essentially the nitrogen lone pairs. They show a polarisation towards the C(NR<sub>2</sub>) groups. The 15  $a_g$  orbital (HOMO-11) clearly shows an interaction between the  $\pi$  system of the C(NR<sub>2</sub>) group and the nitrogen lone pair.

**Results of the calculations (B3LYP/def2-TZVP) with restrictions imposed by symmetry**

**2<sup>2+</sup>-C<sub>2h</sub>-orthogonal** (Energy = -639.9164010109) minimum

|   |            |            |            |
|---|------------|------------|------------|
| C | -0.9615312 | 1.0582683  | 0.0000000  |
| C | 0.3395946  | 1.3787039  | 0.0000000  |
| C | 1.3819270  | 0.3446193  | 0.0000000  |
| C | 0.9615312  | -1.0582683 | 0.0000000  |
| C | -0.3395946 | -1.3787039 | 0.0000000  |
| C | -1.3819270 | -0.3446193 | 0.0000000  |
| H | -1.7188784 | 1.8323860  | 0.0000000  |
| H | 0.6742621  | 2.4082734  | 0.0000000  |
| H | 1.7188784  | -1.8323860 | 0.0000000  |
| H | -0.6742621 | -2.4082734 | 0.0000000  |
| N | 2.6028463  | 0.7521343  | 0.0000000  |
| N | -2.6028463 | -0.7521343 | 0.0000000  |
| C | 3.7424903  | 0.0058553  | 0.0000000  |
| C | -3.7424903 | -0.0058553 | 0.0000000  |
| N | 4.3077394  | -0.3042249 | 1.1575206  |
| N | 4.3077394  | -0.3042249 | -1.1575206 |
| N | -4.3077394 | 0.3042249  | -1.1575206 |
| N | -4.3077394 | 0.3042249  | 1.1575206  |
| H | -3.8975072 | -0.0207607 | -2.0198317 |
| H | -5.2348437 | 0.7022957  | -1.2116410 |
| H | -5.2348437 | 0.7022957  | 1.2116410  |
| H | -3.8975072 | -0.0207607 | 2.0198317  |
| H | 3.8975072  | 0.0207607  | 2.0198317  |
| H | 5.2348437  | -0.7022957 | 1.2116410  |
| H | 5.2348437  | -0.7022957 | -1.2116410 |
| H | 3.8975072  | 0.0207607  | -2.0198317 |

**2<sup>2+</sup>-C<sub>2h</sub>-planar**

Energy = -639.8890254148

|   |            |            |           |
|---|------------|------------|-----------|
| C | -0.8502043 | 1.1491403  | 0.0000000 |
| C | 0.4832401  | 1.3096192  | 0.0000000 |
| C | 1.4351197  | 0.1874348  | 0.0000000 |
| C | 0.8502043  | -1.1491403 | 0.0000000 |
| C | -0.4832401 | -1.3096192 | 0.0000000 |
| C | -1.4351197 | -0.1874348 | 0.0000000 |
| H | -1.4573564 | 2.0403232  | 0.0000000 |
| H | 0.9260833  | 2.2968893  | 0.0000000 |
| H | 1.4573564  | -2.0403232 | 0.0000000 |
| H | -0.9260833 | -2.2968893 | 0.0000000 |
| N | 2.6742808  | 0.5718640  | 0.0000000 |
| N | -2.6742808 | -0.5718640 | 0.0000000 |
| C | 3.8586380  | -0.1285749 | 0.0000000 |
| C | -3.8586380 | 0.1285749  | 0.0000000 |
| N | 4.0272772  | -1.4451107 | 0.0000000 |
| N | 4.9129909  | 0.6699972  | 0.0000000 |
| N | -4.9129909 | -0.6699972 | 0.0000000 |
| N | -4.0272772 | 1.4451107  | 0.0000000 |
| H | -4.7545766 | -1.6674565 | 0.0000000 |
| H | -5.8660840 | -0.3349459 | 0.0000000 |
| H | -4.9503753 | 1.8574237  | 0.0000000 |
| H | -3.2582152 | 2.0872324  | 0.0000000 |
| H | 3.2582152  | -2.0872324 | 0.0000000 |
| H | 4.9503753  | -1.8574237 | 0.0000000 |
| H | 5.8660840  | 0.3349459  | 0.0000000 |
| H | 4.7545766  | 1.6674565  | 0.0000000 |

**2<sup>2+</sup>-D<sub>2h</sub>-orthogonal** (Energy = -639.8883960647)

|   |            |            |            |
|---|------------|------------|------------|
| C | 0.0000000  | -1.2624065 | -0.6695320 |
| C | 0.0000000  | -1.2624065 | 0.6695320  |
| C | 0.0000000  | 0.0000000  | 1.4272772  |
| C | 0.0000000  | 1.2624065  | 0.6695320  |
| C | 0.0000000  | 1.2624065  | -0.6695320 |
| C | 0.0000000  | 0.0000000  | -1.4272772 |
| H | 0.0000000  | -2.1854568 | -1.2352805 |
| H | 0.0000000  | -2.1854568 | 1.2352805  |
| H | 0.0000000  | 2.1854568  | 1.2352805  |
| H | 0.0000000  | 2.1854568  | -1.2352805 |
| N | 0.0000000  | 0.0000000  | 2.6924266  |
| N | 0.0000000  | 0.0000000  | -2.6924266 |
| C | 0.0000000  | 0.0000000  | 3.9969994  |
| C | 0.0000000  | 0.0000000  | -3.9969994 |
| N | 1.1579428  | 0.0000000  | 4.6665370  |
| N | -1.1579428 | 0.0000000  | 4.6665370  |
| N | -1.1579428 | 0.0000000  | -4.6665370 |
| N | 1.1579428  | 0.0000000  | -4.6665370 |
| H | -2.0388792 | 0.0000000  | -4.1805436 |
| H | -1.1797556 | 0.0000000  | -5.6739921 |
| H | 1.1797556  | 0.0000000  | -5.6739921 |
| H | 2.0388792  | 0.0000000  | -4.1805436 |
| H | 2.0388792  | 0.0000000  | 4.1805436  |
| H | 1.1797556  | 0.0000000  | 5.6739921  |
| H | -1.1797556 | 0.0000000  | 5.6739921  |
| H | -2.0388792 | 0.0000000  | 4.1805436  |

**2<sup>2+</sup>-D<sub>2h</sub>-planar** (Energy = -639.8436142373)

|   |           |            |            |
|---|-----------|------------|------------|
| C | 0.0000000 | -1.2523319 | -0.6712978 |
| C | 0.0000000 | -1.2523319 | 0.6712978  |
| C | 0.0000000 | 0.0000000  | 1.4414999  |
| C | 0.0000000 | 1.2523319  | 0.6712978  |
| C | 0.0000000 | 1.2523319  | -0.6712978 |
| C | 0.0000000 | 0.0000000  | -1.4414999 |
| H | 0.0000000 | -2.1805211 | -1.2279719 |
| H | 0.0000000 | -2.1805211 | 1.2279719  |
| H | 0.0000000 | 2.1805211  | 1.2279719  |
| H | 0.0000000 | 2.1805211  | -1.2279719 |
| N | 0.0000000 | 0.0000000  | 2.7166651  |
| N | 0.0000000 | 0.0000000  | -2.7166651 |
| C | 0.0000000 | 0.0000000  | 4.0423802  |
| C | 0.0000000 | 0.0000000  | -4.0423802 |
| N | 0.0000000 | 1.1510650  | 4.7132991  |
| N | 0.0000000 | -1.1510650 | 4.7132991  |
| N | 0.0000000 | -1.1510650 | -4.7132991 |
| N | 0.0000000 | 1.1510650  | -4.7132991 |
| H | 0.0000000 | -2.0191807 | -4.2030907 |
| H | 0.0000000 | -1.2023183 | -5.7229846 |
| H | 0.0000000 | 1.2023183  | -5.7229846 |
| H | 0.0000000 | 2.0191807  | -4.2030907 |
| H | 0.0000000 | 2.0191807  | 4.2030907  |
| H | 0.0000000 | 1.2023183  | 5.7229846  |
| H | 0.0000000 | -1.2023183 | 5.7229846  |
| H | 0.0000000 | -2.0191807 | 4.2030907  |

$1^{2+}$ - $C_i$  (Energy = -954.2569962402) Minimum

|   |            |            |            |
|---|------------|------------|------------|
| C | -0.9923342 | -0.4237885 | -0.9331438 |
| C | 0.2804334  | -0.3433970 | -1.3460816 |
| C | 1.3567553  | 0.0851491  | -0.4443468 |
| C | 0.9923342  | 0.4237885  | 0.9331438  |
| C | -0.2804334 | 0.3433970  | 1.3460816  |
| C | -1.3567553 | -0.0851491 | 0.4443468  |
| H | -1.7716532 | -0.7482269 | -1.6117760 |
| H | 0.5684530  | -0.5974628 | -2.3582213 |
| H | 1.7716532  | 0.7482269  | 1.6117760  |
| H | -0.5684530 | 0.5974628  | 2.3582213  |
| N | 2.5449802  | 0.1247772  | -0.9314576 |
| N | -2.5449802 | -0.1247772 | 0.9314576  |
| C | 3.7101139  | 0.5136196  | -0.3029765 |
| C | -3.7101139 | -0.5136196 | 0.3029765  |
| N | 4.0736893  | 1.7930413  | -0.4209201 |
| N | 4.4776936  | -0.4223628 | 0.2608365  |
| N | -4.0736893 | -1.7930413 | 0.4209201  |
| N | -4.4776936 | 0.4223628  | -0.2608365 |
| C | 3.4197139  | 2.6901169  | -1.3855954 |
| H | 2.6466061  | 3.2895629  | -0.9003835 |
| H | 4.1763327  | 3.3611964  | -1.7900241 |
| H | 2.9864749  | 2.1193959  | -2.2015509 |
| C | 5.0471357  | 2.4484844  | 0.4642095  |
| H | 5.9871477  | 2.6491050  | -0.0507616 |
| H | 4.6174532  | 3.3997410  | 0.7791406  |
| H | 5.2321789  | 1.8458894  | 1.3474979  |
| C | 3.9347396  | -1.7416950 | 0.6138988  |
| H | 3.9804712  | -2.4219513 | -0.2394622 |
| H | 4.5401131  | -2.1480518 | 1.4219782  |
| H | 2.9114359  | -1.6680080 | 0.9676025  |
| C | 5.9522843  | -0.3792719 | 0.2187762  |
| H | 6.3748666  | -0.2352465 | 1.2130022  |
| H | 6.2992229  | -1.3355013 | -0.1731861 |
| H | 6.2962064  | 0.4034970  | -0.4483728 |
| C | -5.0471357 | -2.4484844 | -0.4642095 |
| H | -4.6174532 | -3.3997410 | -0.7791406 |
| H | -5.9871477 | -2.6491050 | 0.0507616  |
| H | -5.2321789 | -1.8458894 | -1.3474979 |
| C | -3.4197139 | -2.6901169 | 1.3855954  |
| H | -4.1763327 | -3.3611964 | 1.7900241  |
| H | -2.6466061 | -3.2895629 | 0.9003835  |
| H | -2.9864749 | -2.1193959 | 2.2015509  |
| C | -3.9347396 | 1.7416950  | -0.6138988 |
| H | -4.5401131 | 2.1480518  | -1.4219782 |
| H | -3.9804712 | 2.4219513  | 0.2394622  |
| H | -2.9114359 | 1.6680080  | -0.9676025 |
| C | -5.9522843 | 0.3792719  | -0.2187762 |
| H | -6.2992229 | 1.3355013  | 0.1731861  |
| H | -6.3748666 | 0.2352465  | -1.2130022 |
| H | -6.2962064 | -0.4034970 | 0.4483728  |

**1<sup>2+</sup>-C<sub>2h</sub>-orthogonal (Energy = -954.2430524483)**

|   |            |            |            |
|---|------------|------------|------------|
| C | -1.4202037 | 0.1735851  | 0.0000000  |
| C | -0.8243719 | -1.1636111 | 0.0000000  |
| C | 0.5069879  | -1.3220218 | 0.0000000  |
| C | 1.4202037  | -0.1735851 | 0.0000000  |
| C | -0.5069879 | 1.3220218  | 0.0000000  |
| C | 0.8243719  | 1.1636111  | 0.0000000  |
| H | -1.4792250 | -2.0259471 | 0.0000000  |
| H | 0.9631668  | -2.3039031 | 0.0000000  |
| H | -0.9631668 | 2.3039031  | 0.0000000  |
| H | 1.4792250  | 2.0259471  | 0.0000000  |
| N | -2.6805308 | 0.4328737  | 0.0000000  |
| N | 2.6805308  | -0.4328737 | 0.0000000  |
| C | -3.6952217 | -0.5181081 | 0.0000000  |
| C | 3.6952217  | 0.5181081  | 0.0000000  |
| N | -4.1626331 | -0.8769939 | -1.2003114 |
| N | -4.1626331 | -0.8769939 | 1.2003114  |
| N | 4.1626331  | 0.8769939  | -1.2003114 |
| N | 4.1626331  | 0.8769939  | 1.2003114  |
| C | -3.6341454 | -0.2302609 | -2.4199206 |
| H | -4.4676383 | -0.0585221 | -3.0975178 |
| H | -2.9045960 | -0.8737649 | -2.9154116 |
| H | -3.1839848 | 0.7282697  | -2.1865603 |
| C | -5.2546622 | -1.8375189 | -1.4706743 |
| H | -5.2853662 | -1.9909901 | -2.5448401 |
| H | -5.0661170 | -2.8024011 | -1.0134141 |
| H | -6.2204088 | -1.4469328 | -1.1561514 |
| C | -3.6341454 | -0.2302609 | 2.4199206  |
| H | -4.4676383 | -0.0585221 | 3.0975178  |
| H | -2.9045960 | -0.8737649 | 2.9154116  |
| H | -3.1839848 | 0.7282697  | 2.1865603  |
| C | -5.2546622 | -1.8375189 | 1.4706743  |
| H | -5.2853662 | -1.9909901 | 2.5448401  |
| H | -5.0661170 | -2.8024011 | 1.0134141  |
| H | -6.2204088 | -1.4469328 | 1.1561514  |
| C | 3.6341454  | 0.2302609  | -2.4199206 |
| H | 4.4676383  | 0.0585221  | -3.0975178 |
| H | 3.1839848  | -0.7282697 | -2.1865603 |
| H | 2.9045960  | 0.8737649  | -2.9154116 |
| C | 3.6341454  | 0.2302609  | 2.4199206  |
| H | 4.4676383  | 0.0585221  | 3.0975178  |
| H | 3.1839848  | -0.7282697 | 2.1865603  |
| H | 2.9045960  | 0.8737649  | 2.9154116  |
| C | 5.2546622  | 1.8375189  | -1.4706743 |
| H | 5.2853662  | 1.9909901  | -2.5448401 |
| H | 6.2204088  | 1.4469328  | -1.1561514 |
| H | 5.0661170  | 2.8024011  | -1.0134141 |
| C | 5.2546622  | 1.8375189  | 1.4706743  |
| H | 5.2853662  | 1.9909901  | 2.5448401  |
| H | 6.2204088  | 1.4469328  | 1.1561514  |
| H | 5.0661170  | 2.8024011  | 1.0134141  |



**1<sup>2+</sup>-C<sub>2h</sub>-planar** (Energy = -954.1659639182)

|   |            |            |            |
|---|------------|------------|------------|
| C | -1.4616568 | -0.1847375 | 0.0000000  |
| C | -0.5367038 | -1.3205201 | 0.0000000  |
| C | 0.7939111  | -1.1310281 | 0.0000000  |
| C | 1.4616568  | 0.1847375  | 0.0000000  |
| C | -0.7939111 | 1.1310281  | 0.0000000  |
| C | 0.5367038  | 1.3205201  | 0.0000000  |
| H | -0.9007094 | -2.3302325 | 0.0000000  |
| H | 1.4548919  | -1.9864839 | 0.0000000  |
| H | -1.4548919 | 1.9864839  | 0.0000000  |
| H | 0.9007094  | 2.3302325  | 0.0000000  |
| N | -2.7502687 | -0.1150663 | 0.0000000  |
| N | 2.7502687  | 0.1150663  | 0.0000000  |
| C | -4.0129895 | -0.6221838 | 0.0000000  |
| C | 4.0129895  | 0.6221838  | 0.0000000  |
| N | -4.3099502 | -1.9394006 | 0.0000000  |
| N | -4.9339455 | 0.3729011  | 0.0000000  |
| N | 4.3099502  | 1.9394006  | 0.0000000  |
| N | 4.9339455  | -0.3729011 | 0.0000000  |
| C | -3.2200720 | -2.9203452 | 0.0000000  |
| H | -3.6481536 | -3.9156315 | 0.0000000  |
| H | -2.6116647 | -2.8230626 | 0.8976052  |
| H | -2.6116647 | -2.8230626 | -0.8976052 |
| C | -5.6668056 | -2.5405815 | 0.0000000  |
| H | -5.5488726 | -3.6175133 | 0.0000000  |
| H | -6.2231354 | -2.2744088 | 0.8929723  |
| H | -6.2231354 | -2.2744088 | -0.8929723 |
| C | -4.4615081 | 1.7784293  | 0.0000000  |
| H | -5.3335932 | 2.4221861  | 0.0000000  |
| H | -3.8725654 | 1.9924808  | 0.8889111  |
| H | -3.8725654 | 1.9924808  | -0.8889111 |
| C | -6.4067086 | 0.2291988  | 0.0000000  |
| H | -6.8358291 | 1.2235445  | 0.0000000  |
| H | -6.7620363 | -0.2764904 | 0.8927006  |
| H | -6.7620363 | -0.2764904 | -0.8927006 |
| C | 3.2200720  | 2.9203452  | 0.0000000  |
| H | 3.6481536  | 3.9156315  | 0.0000000  |
| H | 2.6116647  | 2.8230626  | -0.8976052 |
| H | 2.6116647  | 2.8230626  | 0.8976052  |
| C | 4.4615081  | -1.7784293 | 0.0000000  |
| H | 5.3335932  | -2.4221861 | 0.0000000  |
| H | 3.8725654  | -1.9924808 | -0.8889111 |
| H | 3.8725654  | -1.9924808 | 0.8889111  |
| C | 5.6668056  | 2.5405815  | 0.0000000  |
| H | 5.5488726  | 3.6175133  | 0.0000000  |
| H | 6.2231354  | 2.2744088  | -0.8929723 |
| H | 6.2231354  | 2.2744088  | 0.8929723  |
| C | 6.4067086  | -0.2291988 | 0.0000000  |
| H | 6.8358291  | -1.2235445 | 0.0000000  |
| H | 6.7620363  | 0.2764904  | -0.8927006 |
| H | 6.7620363  | 0.2764904  | 0.8927006  |

**1<sup>2+</sup>-D<sub>2h</sub>-orthogonal** (Energy = -954.2062494846)

|   |            |            |            |
|---|------------|------------|------------|
| C | -1.4359054 | 0.0000000  | 0.0000000  |
| C | -0.6697166 | -1.2582239 | 0.0000000  |
| C | 0.6697166  | -1.2582239 | 0.0000000  |
| C | 1.4359054  | 0.0000000  | 0.0000000  |
| C | -0.6697166 | 1.2582239  | 0.0000000  |
| C | 0.6697166  | 1.2582239  | 0.0000000  |
| H | -1.2335940 | -2.1825066 | 0.0000000  |
| H | 1.2335940  | -2.1825066 | 0.0000000  |
| H | -1.2335940 | 2.1825066  | 0.0000000  |
| H | 1.2335940  | 2.1825066  | 0.0000000  |
| N | -2.6981582 | 0.0000000  | 0.0000000  |
| N | 2.6981582  | 0.0000000  | 0.0000000  |
| C | -4.0247456 | 0.0000000  | 0.0000000  |
| C | 4.0247456  | 0.0000000  | 0.0000000  |
| N | -4.6219317 | 0.0000000  | -1.2108609 |
| N | -4.6219317 | 0.0000000  | 1.2108609  |
| N | 4.6219317  | 0.0000000  | -1.2108609 |
| N | 4.6219317  | 0.0000000  | 1.2108609  |
| C | -3.7458474 | 0.0000000  | -2.3937704 |
| H | -4.3654087 | 0.0000000  | -3.2834276 |
| H | -3.1167639 | -0.8912884 | -2.4198699 |
| H | -3.1167639 | 0.8912884  | -2.4198699 |
| C | -6.0778699 | 0.0000000  | -1.4621722 |
| H | -6.2177320 | 0.0000000  | -2.5376587 |
| H | -6.5576497 | -0.8926105 | -1.0702004 |
| H | -6.5576497 | 0.8926105  | -1.0702004 |
| C | -3.7458474 | 0.0000000  | 2.3937704  |
| H | -4.3654087 | 0.0000000  | 3.2834276  |
| H | -3.1167639 | -0.8912884 | 2.4198699  |
| H | -3.1167639 | 0.8912884  | 2.4198699  |
| C | -6.0778699 | 0.0000000  | 1.4621722  |
| H | -6.2177320 | 0.0000000  | 2.5376587  |
| H | -6.5576497 | -0.8926105 | 1.0702004  |
| H | -6.5576497 | 0.8926105  | 1.0702004  |
| C | 3.7458474  | 0.0000000  | -2.3937704 |
| H | 4.3654087  | 0.0000000  | -3.2834276 |
| H | 3.1167639  | -0.8912884 | -2.4198699 |
| H | 3.1167639  | 0.8912884  | -2.4198699 |
| C | 3.7458474  | 0.0000000  | 2.3937704  |
| H | 4.3654087  | 0.0000000  | 3.2834276  |
| H | 3.1167639  | -0.8912884 | 2.4198699  |
| H | 3.1167639  | 0.8912884  | 2.4198699  |
| C | 6.0778699  | 0.0000000  | -1.4621722 |
| H | 6.2177320  | 0.0000000  | -2.5376587 |
| H | 6.5576497  | -0.8926105 | -1.0702004 |
| H | 6.5576497  | 0.8926105  | -1.0702004 |
| C | 6.0778699  | 0.0000000  | 1.4621722  |
| H | 6.2177320  | 0.0000000  | 2.5376587  |
| H | 6.5576497  | -0.8926105 | 1.0702004  |
| H | 6.5576497  | 0.8926105  | 1.0702004  |

**1<sup>2+</sup>-D<sub>2h</sub>-planar** (Energy = -954.1617510825)

|   |            |            |            |
|---|------------|------------|------------|
| C | -1.4620895 | 0.0000000  | 0.0000000  |
| C | -0.6717745 | -1.2403640 | 0.0000000  |
| C | 0.6717745  | -1.2403640 | 0.0000000  |
| C | 1.4620895  | 0.0000000  | 0.0000000  |
| C | -0.6717745 | 1.2403640  | 0.0000000  |
| C | 0.6717745  | 1.2403640  | 0.0000000  |
| H | -1.2059547 | -2.1779666 | 0.0000000  |
| H | 1.2059547  | -2.1779666 | 0.0000000  |
| H | -1.2059547 | 2.1779666  | 0.0000000  |
| H | 1.2059547  | 2.1779666  | 0.0000000  |
| N | -2.7405989 | 0.0000000  | 0.0000000  |
| N | 2.7405989  | 0.0000000  | 0.0000000  |
| C | -4.0774008 | 0.0000000  | 0.0000000  |
| C | 4.0774008  | 0.0000000  | 0.0000000  |
| N | -4.7024667 | -1.2012667 | 0.0000000  |
| N | -4.7024667 | 1.2012667  | 0.0000000  |
| N | 4.7024667  | 1.2012667  | 0.0000000  |
| N | 4.7024667  | -1.2012667 | 0.0000000  |
| C | -3.8652542 | -2.4139317 | 0.0000000  |
| H | -4.5171310 | -3.2799913 | 0.0000000  |
| H | -3.2433729 | -2.4567629 | 0.8928809  |
| H | -3.2433729 | -2.4567629 | -0.8928809 |
| C | -6.1613629 | -1.4484339 | 0.0000000  |
| H | -6.3160932 | -2.5208531 | 0.0000000  |
| H | -6.6352805 | -1.0505162 | 0.8924845  |
| H | -6.6352805 | -1.0505162 | -0.8924845 |
| C | -3.8652542 | 2.4139317  | 0.0000000  |
| H | -4.5171310 | 3.2799913  | 0.0000000  |
| H | -3.2433729 | 2.4567629  | 0.8928809  |
| H | -3.2433729 | 2.4567629  | -0.8928809 |
| C | -6.1613629 | 1.4484339  | 0.0000000  |
| H | -6.3160932 | 2.5208531  | 0.0000000  |
| H | -6.6352805 | 1.0505162  | 0.8924845  |
| H | -6.6352805 | 1.0505162  | -0.8924845 |
| C | 3.8652542  | 2.4139317  | 0.0000000  |
| H | 4.5171310  | 3.2799913  | 0.0000000  |
| H | 3.2433729  | 2.4567629  | -0.8928809 |
| H | 3.2433729  | 2.4567629  | 0.8928809  |
| C | 3.8652542  | -2.4139317 | 0.0000000  |
| H | 4.5171310  | -3.2799913 | 0.0000000  |
| H | 3.2433729  | -2.4567629 | -0.8928809 |
| H | 3.2433729  | -2.4567629 | 0.8928809  |
| C | 6.1613629  | 1.4484339  | 0.0000000  |
| H | 6.3160932  | 2.5208531  | 0.0000000  |
| H | 6.6352805  | 1.0505162  | -0.8924845 |
| H | 6.6352805  | 1.0505162  | 0.8924845  |
| C | 6.1613629  | -1.4484339 | 0.0000000  |
| H | 6.3160932  | -2.5208531 | 0.0000000  |
| H | 6.6352805  | -1.0505162 | -0.8924845 |
| H | 6.6352805  | -1.0505162 | 0.8924845  |
